# Supplementary material
Source: HighWire-hosted journal article supplement (http://www.ajnr.org/highwire/filestream/52179/field_highwire_adjunct_files/0/2269_table.pdf)
Supplement: 2269_table.pdf [file 2269_table.pdf]

**On-line Table 1: Description and results obtained on the 33 patients studied**

| Case No.        | Age (yr) | Sex | Tumor Location                   | Biopsy Type             | Histologic Diagnosis | Score | SD   | Predicted Tumor Type |
|-----------------|----------|-----|----------------------------------|-------------------------|----------------------|-------|------|----------------------|
| 1               | 43       | M   | Temporal lobe right <sup>a</sup> | Resection <sup>b</sup>  | MET                  | 0.22  | 0.11 | GBM                  |
| 2 <sup>c</sup>  | 35       | M   | Frontal lobe right               | Resection               | GBM                  | 0.46  | 0.13 | GBM                  |
| 3               | 60       | M   | Parietal-frontal lobe left       | Biopsy                  | GBM                  | 0.40  | 0.12 | GBM                  |
| 4               | 51       | F   | Parietal lobe left               | Resection               | MET                  | 0.67  | 0.04 | MET                  |
| 5               | 54       | M   | Frontal lobe left                | Resection               | MET                  | 0.66  | 0.05 | MET                  |
| 6               | 36       | F   | Parietal lobe left               | Resection               | GBM                  | 0.52  | 0.11 | GBM                  |
| 7               | 51       | M   | Frontal lobe left                | Resection               | MET                  | 0.60  | 0.06 | MET                  |
| 8               | 50       | M   | Frontal lobe right and left      | Biopsy                  | GBM                  | 0.32  | 0.08 | GBM                  |
| 9               | 56       | M   | Occipital lobe right             | Resection               | MET                  | 0.62  | 0.07 | MET                  |
| 10              | 63       | M   | Parietal lobe right              | Resection               | MET                  | 0.63  | 0.05 | MET                  |
| 11              | 60       | F   | Parietal-occipital lobe left     | Resection               | GBM                  | 0.39  | 0.07 | GBM                  |
| 12              | 69       | M   | Parietal lobe left               | Biopsy                  | MET                  | 0.57  | 0.06 | MET                  |
| 13              | 60       | M   | Occipital lobe left              | Resection               | GBM                  | 0.50  | 0.09 | GBM                  |
| 14              | 71       | M   | Parietal-temporal lobe right     | Resection               | MET                  | 0.60  | 0.07 | MET                  |
| 15              | 47       | M   | Occipital lobe right             | Resection               | GBM                  | 0.38  | 0.06 | GBM                  |
| 16 <sup>c</sup> | 64       | M   | Frontal lobe left                | Biopsy                  | GBM                  | 0.57  | 0.08 | MET                  |
| 17              | 64       | F   | Cerebellar midline               | Resection               | MET                  | 0.67  | 0.00 | MET                  |
| 18              | 75       | M   | Parietal lobe right              | Resection               | MET                  | 0.65  | 0.08 | MET                  |
| 19              | 71       | M   | Parietal lobe right              | Resection               | GBM                  | 0.42  | 0.06 | GBM                  |
| 20              | 51       | M   | Frontal lobe right               | Resection               | GBM                  | 0.46  | 0.06 | GBM                  |
| 21              | 50       | F   | Frontal lobe left                | Resection               | MET                  | 0.58  | 0.06 | MET                  |
| 22              | 38       | M   | Temporal lobe right              | Resection               | GBM                  | 0.39  | 0.06 | GBM                  |
| 23              | 77       | M   | Cerebellar lobe right            | Resection               | MET                  | 0.61  | 0.11 | MET                  |
| 24              | 45       | M   | Temporal lobe right              | Resection               | GBM                  | 0.41  | 0.07 | GBM                  |
| 25              | 78       | M   | Frontal lobe right               | Resection               | GBM                  | 0.43  | 0.09 | GBM                  |
| 26              | 62       | F   | Frontal lobe left                | No surgery <sup>d</sup> | MET                  | 0.60  | 0.07 | MET                  |
| 27              | 29       | M   | Cerebellar lobe left             | Resection               | GBM                  | 0.42  | 0.09 | GBM                  |
| 28              | 45       | M   | Parietal lobe right              | Resection               | GBM                  | 0.52  | 0.05 | GBM                  |
| 29              | 50       | M   | Occipital lobe left              | Resection               | MET                  | 0.60  | 0.08 | MET                  |
| 30              | 47       | F   | Frontal lobe left                | Resection               | MET                  | 0.54  | 0.08 | MET                  |
| 31              | 41       | F   | Occipital lobe right             | Biopsy                  | GBM                  | 0.35  | 0.09 | GBM                  |
| 32              | 55       | M   | Parietal-occipital lobe left     | Biopsy                  | GBM                  | 0.42  | 0.06 | GBM                  |
| 33              | 47       | F   | Parietal lobe left               | Biopsy                  | GBM                  | 0.25  | 0.07 | GBM                  |

<sup>a</sup>Intracranial growth of extracranial tumor.<sup>b</sup>Removal of intracranial part of tumor.<sup>c</sup>Missclassified.<sup>d</sup>Too sick for surgery (died 1 month after MR imaging).
